# Supplementary material for: Controlled synthesis and optimum luminescence of Sm3+-activated nano/submicroscale ceria particles by a facile approach
Source: Royal Society of Chemistry journal article supplement (doi:10.1039/c3tc32424a), 2014-01-01
Supplement: c3tc32424a.pdf [file c3tc32424a.pdf]

## Supplemental information 1

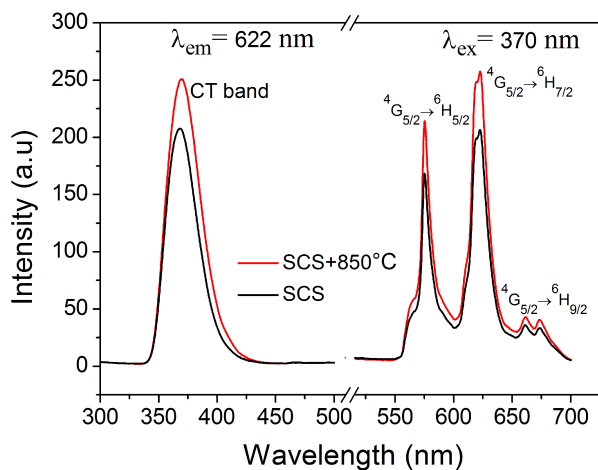

**Fig. 1** Excitation and emission spectra of  $\text{CeO}_2:\text{Sm}^{3+}$  ( $x=1.5$  mol%) prepared by SCS.

## Supplemental information 2

**Table 1.** The BET specific surface area of  $\text{CeO}_2:\text{Sm}^{3+}$  ( $x = 1.5$  mol%) samples prepared by different approaches

| Preparation Approach | BET Specific Surface Area ( $\text{m}^2/\text{g}$ ) |
|----------------------|-----------------------------------------------------|
| SCS                  | 3.5600                                              |
| SCS + 850 °C         | 3.2539                                              |
| PVACS                | 30.7962                                             |
| PVACS + 650°C        | 11.9390                                             |
| PVACS + 700°C        | 2.4737                                              |
| PVACS + 750°C        | 0.8464                                              |
| PVACS + 800°C        | 0.2439                                              |
| PVACS + 850°C        | 0.1245                                              |
